# Supplementary material
Source: MDPI journal article supplement (https://www.mdpi.com/1424-2818/14/2/133)
Supplement: s1 [file s1]

**Table S1.** Multi-season occupancy models for the wild mesocarnivore species. Only significant models (DeltaAIC <2) are shown, and null models ( $\psi(\cdot)$ ,  $\gamma(\cdot)$ ,  $p(\cdot)$ ) shown for comparison.

| SPECIES      | MODEL                                                                 | AIC    | DELTA AIC | AICC WEIGHT | MODEL LIKELIHOOD | NO. PAR. |
|--------------|-----------------------------------------------------------------------|--------|-----------|-------------|------------------|----------|
| GENET        | $\psi(\cdot), \gamma(\cdot), p(\text{bait})$                          | 96.05  | 0         | 0.38        | 1.00             | 4        |
|              | $\psi(\text{PC2}), \gamma(\cdot), p(\text{bait})$                     | 97.09  | 1.04      | 0.23        | 0.59             | 5        |
|              | $\psi(\text{PC1}), \gamma(\cdot), p(\text{bait})$                     | 97.49  | 1.44      | 0.18        | 0.49             | 5        |
|              | $\psi(\cdot), \gamma(\cdot), p(\cdot)$                                | 101.98 | 5.93      | 0.02        | 0.05             | 3        |
| STONE MARTEN | $\psi(\text{PC2}), \gamma(\cdot), \varepsilon(\cdot), p(\text{bait})$ | 220.44 | 0         | 0.83        | 1.00             | 6        |
|              | $\psi(\cdot), \gamma(\cdot), p(\cdot)$                                | 235.53 | 15.09     | 0.00        | 0.00             | 3        |
| RED FOX      | $\psi(\text{PC1}), \gamma(\cdot), p(\text{bait})$                     | 356.07 | 0         | 0.29        | 1.00             | 5        |
|              | $\psi(\cdot), \gamma(\cdot), p(\text{bait})$                          | 356.09 | 0.02      | 0.29        | 0.99             | 4        |
|              | $\psi(\text{PC2}), \gamma(\cdot), p(\text{bait})$                     | 356.66 | 0.59      | 0.22        | 0.74             | 5        |
|              | $\psi(\cdot), \gamma(\cdot), p(\cdot)$                                | 359.71 | 3.64      | 0.05        | 0.16             | 3        |
| BADGER       | $\psi(\cdot), \gamma(\cdot), p(\cdot)$                                | 183.70 | 0.00      | 0.38        | 1.00             | 3        |
|              | $\psi(\cdot), \gamma(\cdot), p(\text{bait})$                          | 184.71 | 1.01      | 0.23        | 0.60             | 4        |
|              | $\psi(\text{PC1}), \gamma(\cdot), p(\text{bait})$                     | 185.61 | 1.91      | 0.15        | 0.38             | 5        |

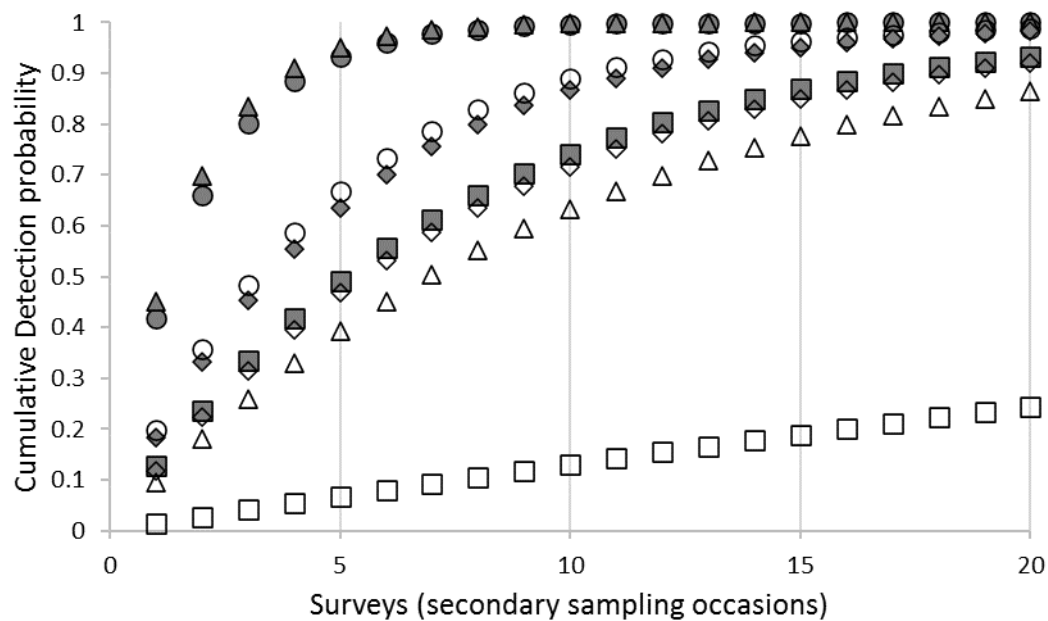

**Figure S1.** Cumulative detection probabilities of the four wild mesocarnivores along field surveys (secondary sampling occasions) in baited (dark symbols) and non-baited (open symbols) camera stations. Red fox (circle), stone marten (triangle), genet (square), and badger (diamond).
